# Supplementary figures and images for: Two zinc(ii) coordination polymers based on flexible co-ligands featuring assembly imparted sensing abilities for Cr2O72− and o-NP
Source: Royal Society of Chemistry journal article supplement (doi:10.1039/c9ra03822a), 2019-01-01

### Supporting Information

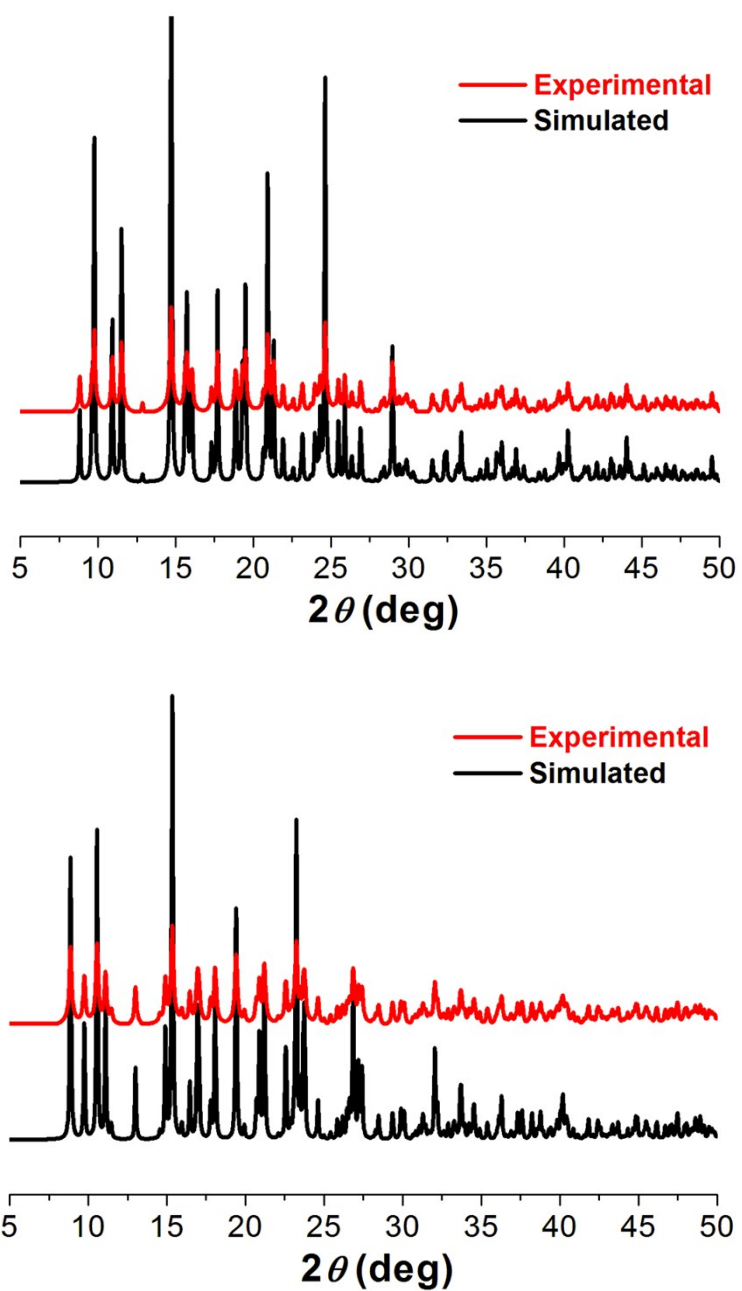

**Fig. S1.** PXRD patterns of complexes 1-2.

Supplement: c9ra03822a1.pdf [file c9ra03822a1.pdf]
